# Supplementary material for: Facile synthesis and supercapacitor performances of nitrogen doped CNTs grown over mesoporous Fe/SBA-15 catalyst
Source: Royal Society of Chemistry journal article supplement (doi:10.1039/c7nj00804j), 2017-01-01
Supplement: c7nj00804j1.pdf [file c7nj00804j1.pdf]

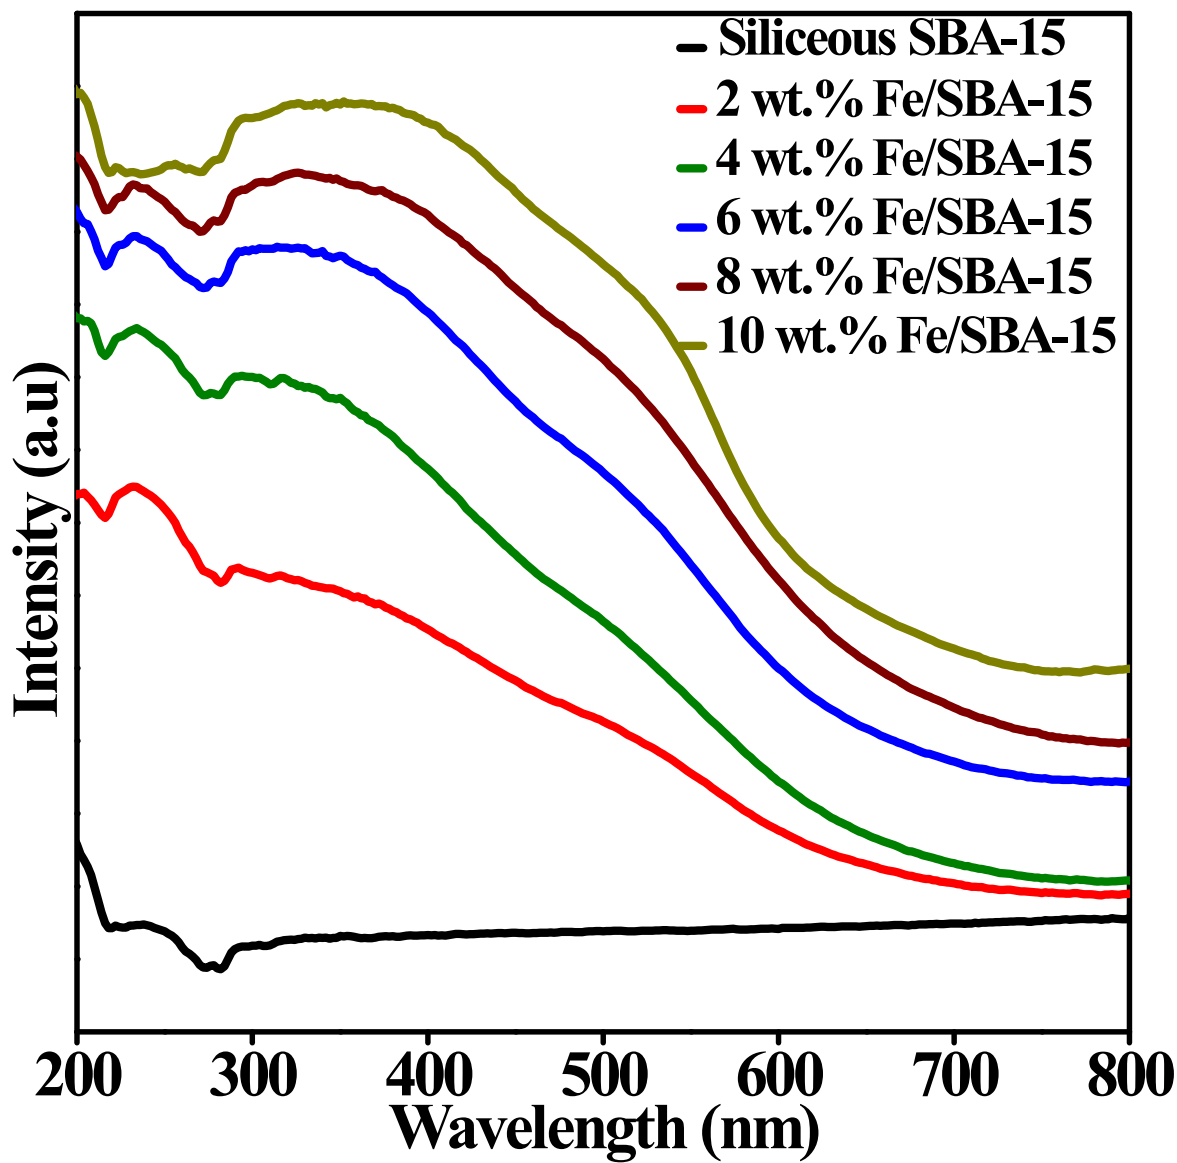

Fig.S1 DRS-UV visible spectra of SBA-15 catalysts

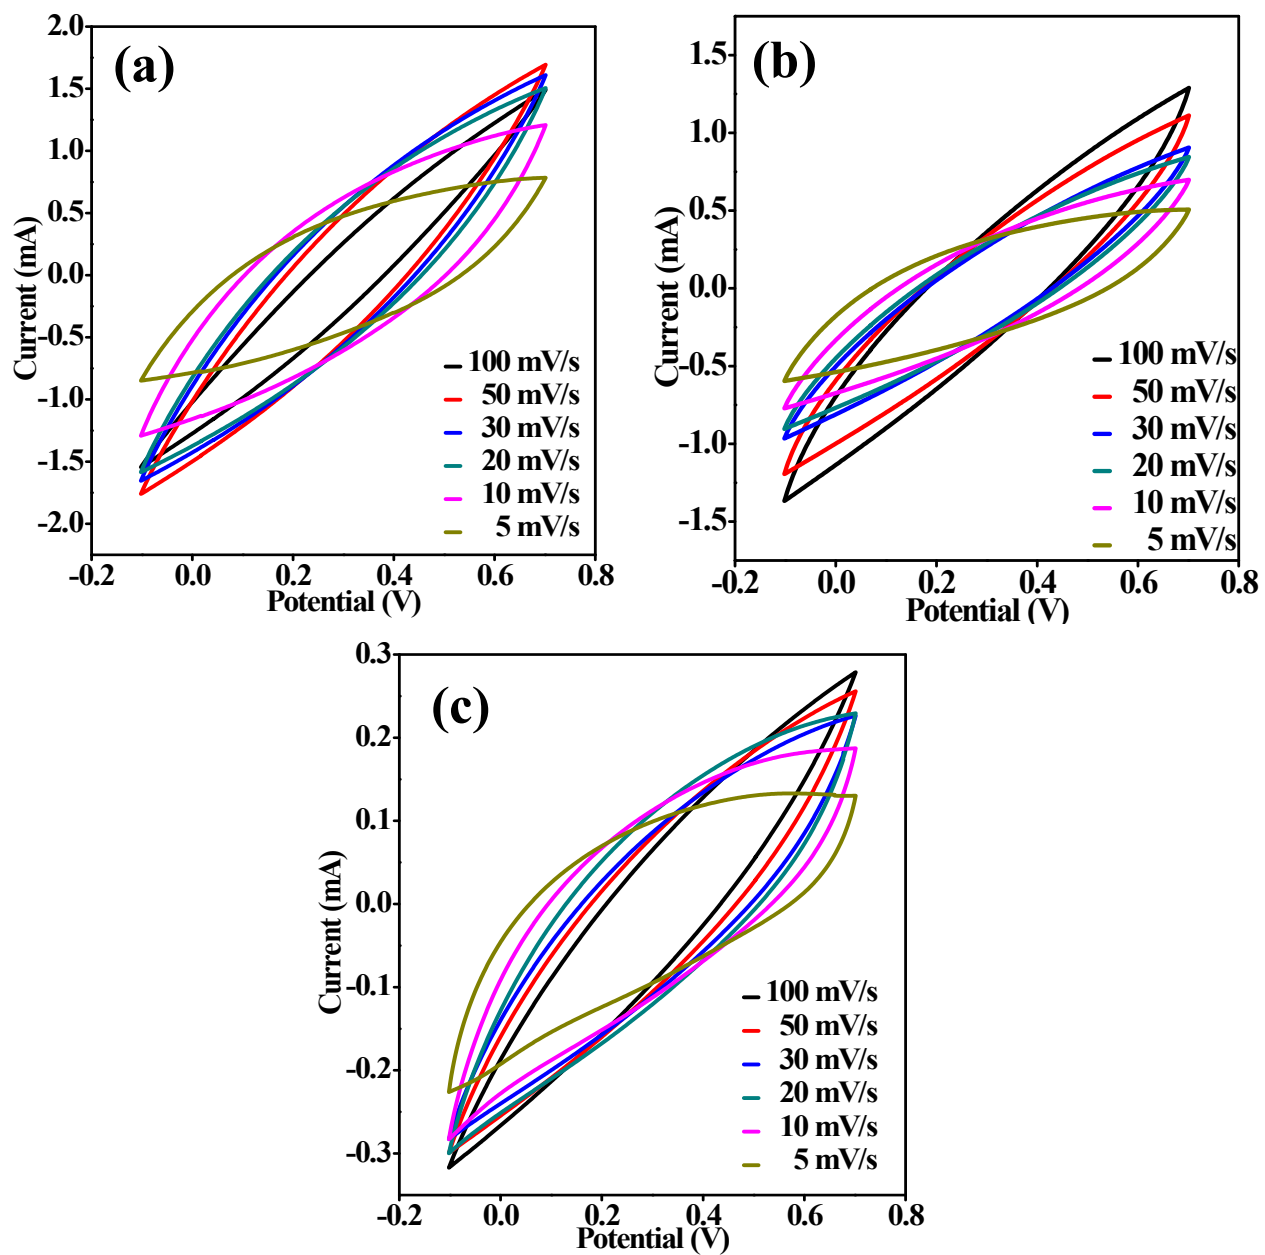

**Fig.S2** Cyclic voltammograms at different scan rates of (a) NCNT 800, (b) NCNT 900 and (c) NCNT 1000

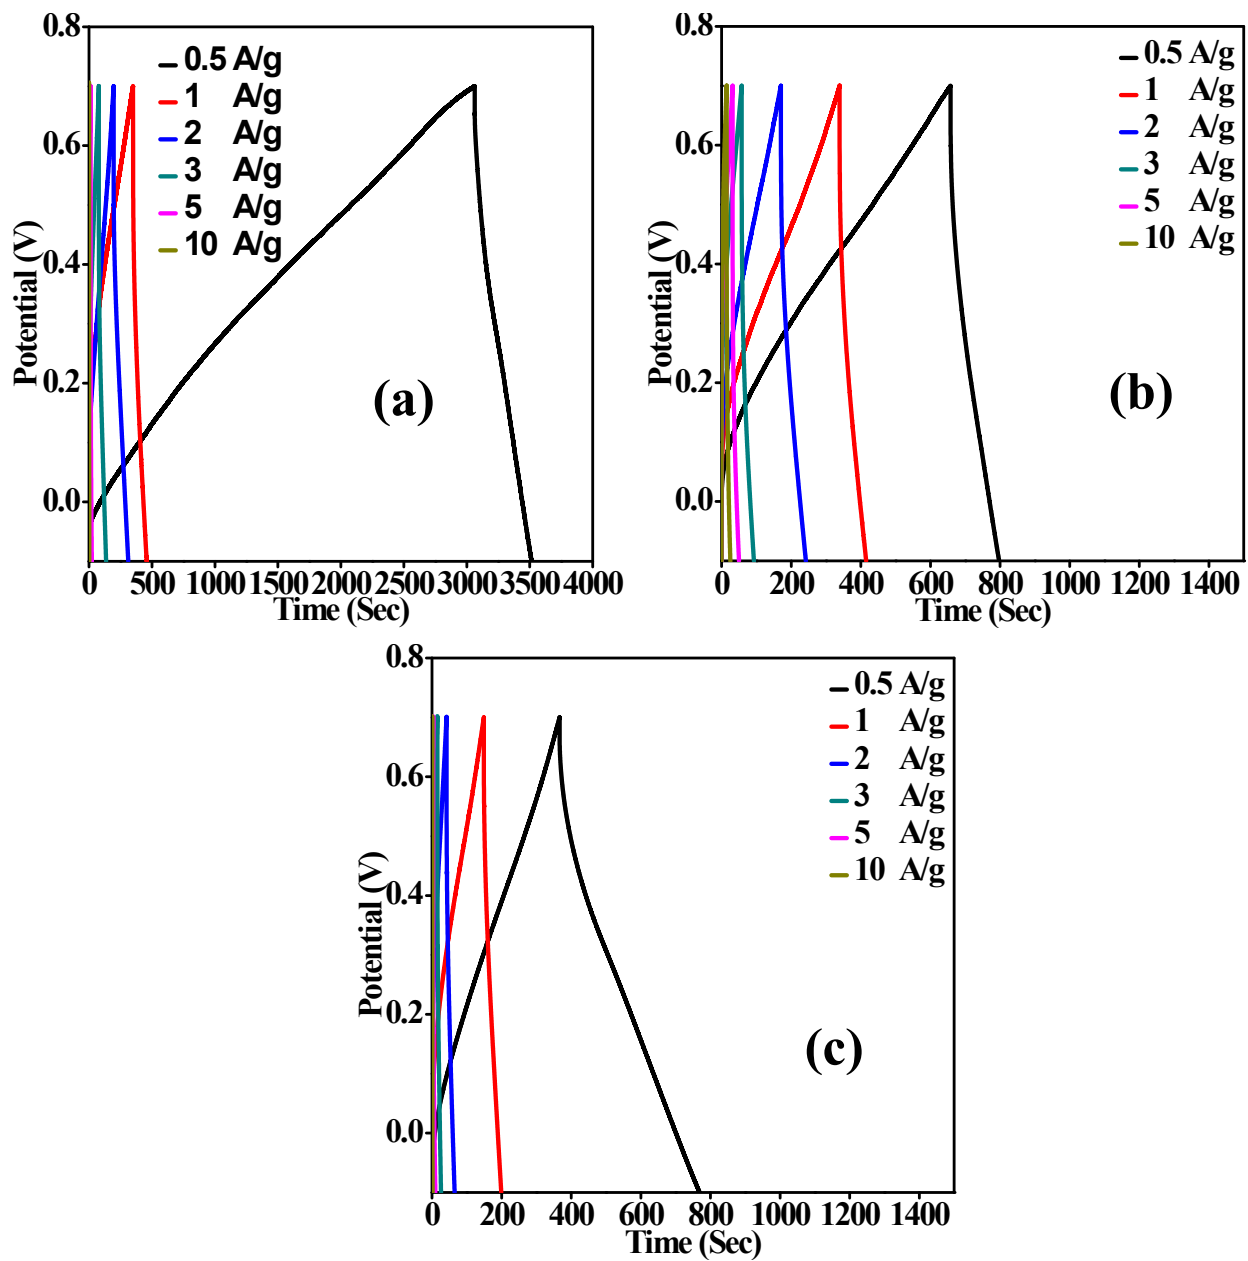

**Fig.S3** Charge-discharge profiles at different current densities of (a) NCNT 800, (b) NCNT 900 and (c) NCNT 1000.
